# Supplementary material for: Thermodynamics of selective serotonin reuptake inhibitors partitioning into 1,2-dioleoyl-sn-glycero-3-phosphocholine bilayers
Source: Royal Society of Chemistry journal article supplement (doi:10.1039/d0ra07367a), 2020-01-01
Supplement: d0ra07367a1.pdf [file d0ra07367a1.pdf]

## Supplementary Information

### Thermodynamics of selective serotonin reuptake inhibitors partitioning into 1,2-dioleoyl-*sn*-glycero-3-phosphocholine bilayers

Dat Tien Nguyen Ngo,<sup>ad</sup> Trinh Quan Nguyen,<sup>ad</sup> Hieu Kim Huynh<sup>b</sup> and Trang Thao Nguyen<sup>\*cd</sup>

<sup>a</sup> Department of Biotechnology, International University, Block 6, Linh Trung Ward, Thu Duc District, Ho Chi Minh City, Vietnam

<sup>b</sup> University of Medicine and Pharmacy at Ho Chi Minh City, 217 Hong Bang, Ward 11, District 5, Ho Chi Minh City, Vietnam

<sup>c</sup> Department of Chemical Engineering, International University, Block 6, Linh Trung Ward, Thu Duc District, Ho Chi Minh City, Vietnam

<sup>d</sup> Vietnam National University, Ho Chi Minh City, Vietnam

\* Corresponding author: [nttrang@hcmiu.edu.vn](mailto:nttrang@hcmiu.edu.vn)

## Supporting Information

### Addition spectra

In order to validate the interaction of either SSRIs and DOPC LUVs, a mathematical addition of the pure SSRI spectrum to the pure lipid spectrum was conducted. The results of the mathematical addition of either PAX or SER to DOPC liposomes were demonstrated in Fig. S1 and Fig. S2, respectively. Peak components were obtained by deconvolution of the addition spectra and presented in Table S1. The obtained results indicated that the addition spectra were different from the mixture spectra in terms of shape and vibrational frequency assignments.

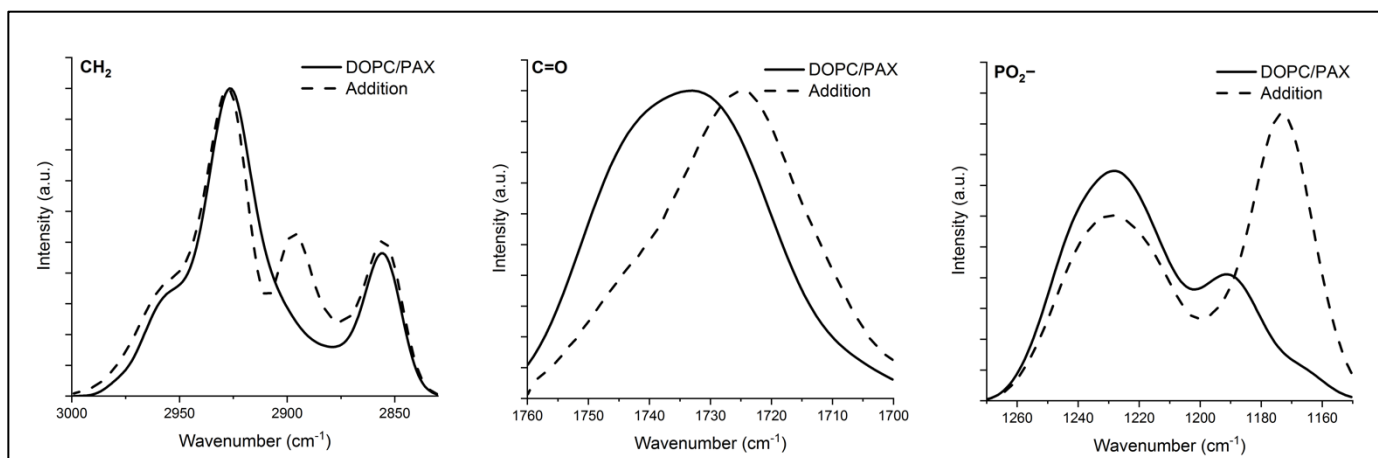

**Figure S1.** Normalized ATR-FTIR spectrum of mixture of DOPC and PAX (solid line) and addition spectrum (dash line) obtained by mathematical addition of pure DOPC and PAX.

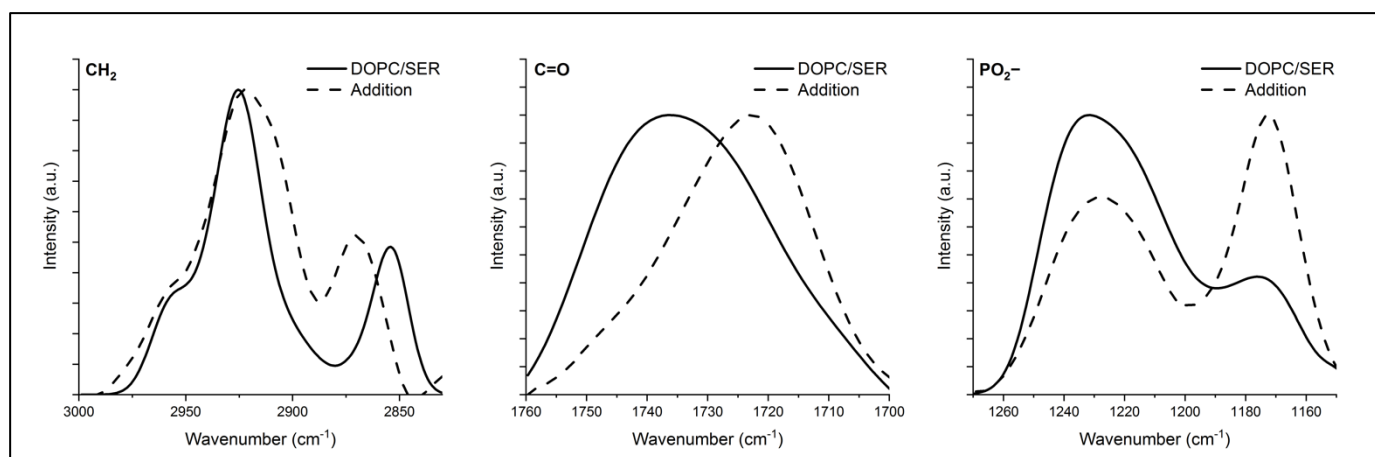

**Figure S2.** Normalized ATR-FTIR spectrum of mixture of DOPC and SER (solid line) and addition spectrum (dash line) obtained by mathematical addition of pure DOPC and SER.

**Table S1.** Vibrational frequency assignments of the CH<sub>2</sub>, C=O and PO<sub>2</sub><sup>-</sup> regions of the addition spectra.

| Addition spectra  | $\nu_s\text{CH}_2$<br>(cm <sup>-1</sup> ) | $\nu_{as}\text{CH}_2$<br>(cm <sup>-1</sup> ) | $\nu\text{C=O}_{\text{bonded}}$<br>(cm <sup>-1</sup> ) | $\nu\text{C=O}_{\text{free}}$<br>(cm <sup>-1</sup> ) | $\nu\text{PO}_2^-_{\text{free}}$<br>(cm <sup>-1</sup> ) | $\nu\text{PO}_2^-_{\text{bonded}}$<br>(cm <sup>-1</sup> ) |
|-------------------|-------------------------------------------|----------------------------------------------|--------------------------------------------------------|------------------------------------------------------|---------------------------------------------------------|-----------------------------------------------------------|
| <b>DOPC + PAX</b> | 2898                                      | 2927                                         | 1722                                                   | 1729                                                 | 1229                                                    | 1171                                                      |
| <b>DOPC + SER</b> | 2868                                      | 2923                                         | 1721                                                   | 1734                                                 | 1219                                                    | 1173                                                      |
